# Supplementary material for: High Glucose Enhances Cytotoxic T Lymphocyte-Mediated Cytotoxicity
Source: PubMed Central journal article supplement (PMC8267470; doi:10.3389/fimmu.2021.689337), 2021-06-25
Supplement: DataSheet_1.pdf [file DataSheet_1.pdf]

## Supplementary Material

### Supplementary Figure legend

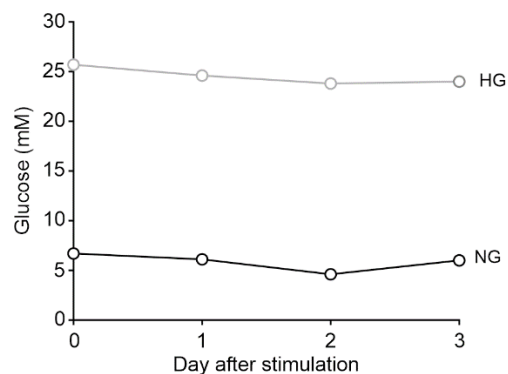

**Supplementary Fig. 1 Glucose level after compensation.** Primary human CD8<sup>+</sup> T cells were stimulated with anti-CD3/CD28-antibody coated beads in medium containing NG (5.6 mM) or HG (25 mM) for 3 days. Consumed glucose was compensated by newly added glucose. Glucose concentration was measured at indicated time points using blood glucose meter (Bayer).

### Supplementary Movie legend

**Movie 1. Visualization of EG7-pCasper cells.** EG7-pCasper cells were embedded in collagen (2 mg/ml) in a 96-well plate. Signals from FRET channel and GFP channel were acquired with a high-content imaging system (ImageXpress) with an 20× objective at 37°C with 5% CO<sub>2</sub> every 10 minutes for 24 hours.

**Movie 2. Determination of killing kinetics of control mouse CTLs in 3D.** EG7-pCasper cells were embedded in collagen (2 mg/ml) in a 96-well plate. Stimulated CTLs (day 3) from the control mouse were added after consolidation of collagen with an E:T ratio of 10:1. Signals from FRET channel and GFP channel were acquired with a high-content imaging system (ImageXpress) with an 20× objective at 37°C with 5% CO<sub>2</sub> every 10 minutes for 24 hours.

**Movie 3. Determination of killing kinetics of diabetic mouse CTLs in 3D.** EG7-pCasper cells were embedded in collagen (2 mg/ml) in a 96-well plate. Stimulated CTLs (day 3) from a diabetic mouse (STZ3) were added after consolidation of collagen with an E:T ratio of 10:1. Signals from FRET channel and GFP channel were acquired with a high-content imaging system (ImageXpress) with an 20× objective at 37°C with 5% CO<sub>2</sub> every 10 minutes for 24 hours.
